# Supplementary material
Source: MDPI journal article supplement (https://www.mdpi.com/2227-7390/10/22/4177)
Supplement: s1 [file s1]

**Supplement Table S1.** The classification results are based on leave-one-out cross-validation using single-channel per-time on eye-open status with a 95% confidence interval (CI)

| Left/Right | Channel | Sen         | Sep         | Acc          | CI( 95%)           |
|------------|---------|-------------|-------------|--------------|--------------------|
| Right      | Fp2     | 0.89        | 0.88        | <b>88.5%</b> | (0.87,0.90)        |
|            | F8      | 0.89        | 0.82        | 85.9%        | (0.84,0.88)        |
|            | T4      | <b>0.87</b> | <b>0.91</b> | <b>89.2%</b> | <b>(0.87,0.91)</b> |
|            | T6      | 0.86        | 0.88        | 86.9%        | (0.85,0.89)        |
|            | O2      | 0.89        | 0.81        | 84.8%        | (0.83,0.87)        |
| Left       | Fp1     | 0.88        | 0.85        | 86.8%        | (0.85,0.89)        |
|            | F7      | 0.89        | 0.81        | 85.1%        | (0.83,0.87)        |
|            | T3      | <b>0.94</b> | 0.82        | <b>88.0%</b> | (0.86,0.90)        |
|            | T5      | <b>0.94</b> | 0.82        | <b>88.0%</b> | (0.86,0.90)        |
|            | O1      | 0.87        | 0.89        | 88.3%        | (0.86,0.90)        |
| Right      | F4      | 0.90        | 0.81        | 85.3%        | (0.87,0.90)        |
|            | C4      | 0.89        | 0.81        | 84.7%        | (0.83,0.87)        |
|            | P4      | 0.88        | 0.89        | 88.4%        | (0.86,0.90)        |
| Left       | T5      | 0.82        | 0.88        | 85.2%        | (0.83,0.87)        |
|            | O1      | 0.88        | 0.88        | 88.1%        | (0.86,0.90)        |
|            | F3      | 0.84        | 0.89        | 86.6%        | (0.85,0.89)        |
| Centre     | Fz      | 0.84        | 0.84        | 84.0%        | (0.82,0.86)        |
|            | Cz      | 0.83        | 0.91        | 86.9%        | (0.85,0.89)        |
|            | Pz      | 0.86        | <b>0.88</b> | 87.2%        | (0.86,0.89)        |

**Supplement Table S2.** The classification results are based on leave-one-out cross-validation using single-channel per-time on eye-close status with a 95% confidence interval (CI)

| Left/Right | Channel | Sen  | Sep  | Acc   | CI( 95%)            |
|------------|---------|------|------|-------|---------------------|
| Right      | Fp2     | 0.87 | 0.88 | 87.3% | (0.85, 0.89)        |
|            | F8      | 0.90 | 0.82 | 86.5% | (0.84, 0.88)        |
|            | T4      | 0.93 | 0.91 | 92.0% | <b>(0.90, 0.94)</b> |
|            | T6      | 0.91 | 0.87 | 89.4% | (0.87, 0.91)        |
|            | O2      | 0.89 | 0.77 | 83.2% | (0.81, 0.86)        |
| Left       | Fp1     | 0.89 | 0.85 | 86.7% | (0.85, 0.89)        |
|            | F7      | 0.89 | 0.87 | 87.9% | (0.86, 0.90)        |
|            | T3      | 0.96 | 0.85 | 90.8% | <b>(0.89, 0.93)</b> |
|            | T5      | 0.89 | 0.88 | 88.8% | (0.86, 0.90)        |
|            | O1      | 0.89 | 0.78 | 83.6% | (0.81, 0.86)        |
| Right      | F4      | 0.89 | 0.87 | 88.1% | (0.86, 0.90)        |
|            | C4      | 0.91 | 0.82 | 86.6% | (0.85, 0.89)        |
|            | P4      | 0.87 | 0.83 | 85.0% | (0.83, 0.87)        |
| Left       | T5      | 0.88 | 0.88 | 88.0% | (0.86, 0.90)        |
|            | O1      | 0.91 | 0.85 | 88.2% | (0.86, 0.90)        |
|            | F3      | 0.89 | 0.82 | 85.8% | (0.84, 0.88)        |
| Centre     | Fz      | 0.84 | 0.84 | 83.7% | (0.81, 0.86)        |
|            | Cz      | 0.87 | 0.89 | 88.3% | (0.86, 0.90)        |
|            | Pz      | 0.89 | 0.86 | 87.5% | (0.86, 0.90)        |
